# Supplementary material
Source: Springer Nature journal article supplement (https://www.springermedizin.de/resource/supplementary/12913_2010_1878_MOESM1_ESM.pdf/9529168)
Supplement: MOESM1 [file 9529168]

Research question

Becoming  
a  
counsellor

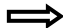

A meaning unit

When you see human  
suffering, you know  
that with your own  
small contribution you  
can change lives

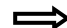

Selected codes from meaning unit

Human sympathy  
Showing compassion  
Helping the suffering  
Giving Hope

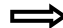

Codes developed into category

Concern  
for  
humanity
